# Supplementary material
Source: PubMed Central journal article supplement (PMC2877318)
Supplement: mmc1.pdf [file mmc1.pdf]

Biophysical Journal, Volume 98

**Supporting Material**

**Diffusion of the Reaction Boundary of Rapidly Interacting Macromolecules in Sedimentation Velocity**

Peter Schuck

## Supporting Material

The Supporting Material contains a more detailed derivation of Eqs 2, 3 and 4, as well as Figures S1 – S3.

### Derivation of Eqs 2, 3, and 4

For the rapidly interacting  $A + B \leftrightarrow AB$  system considered here, the Lamm equations Eq. 1 are:

$$\begin{aligned} \frac{\partial c_A}{\partial t} + \frac{1}{r} \frac{\partial}{\partial r} \left[ c_A s_A \omega^2 r^2 - D_A \frac{\partial c_A}{\partial r} r \right] &= q_A \\ \frac{\partial c_B}{\partial t} + \frac{1}{r} \frac{\partial}{\partial r} \left[ c_B s_B \omega^2 r^2 - D_B \frac{\partial c_B}{\partial r} r \right] &= q_B \\ \frac{\partial c_{AB}}{\partial t} + \frac{1}{r} \frac{\partial}{\partial r} \left[ c_{AB} s_{AB} \omega^2 r^2 - D_{AB} \frac{\partial c_{AB}}{\partial r} r \right] &= q_{AB} \end{aligned} \quad (\text{Eq. S1})$$

From mass conservation, it follows that  $q_A = -q_{AB}$ , and adding the first and third equation gives, and the second and third equation, respectively, gives

$$\begin{aligned} \frac{\partial (c_A + c_{AB})}{\partial t} + \frac{1}{r} \frac{\partial}{\partial r} \left[ (c_A s_A + c_{AB} s_{AB}) \omega^2 r^2 - (D_A \frac{\partial c_A}{\partial r} + D_{AB} \frac{\partial c_{AB}}{\partial r}) r \right] &= 0 \\ \frac{\partial (c_B + c_{AB})}{\partial t} + \frac{1}{r} \frac{\partial}{\partial r} \left[ (c_B s_B + c_{AB} s_{AB}) \omega^2 r^2 - (D_B \frac{\partial c_B}{\partial r} + D_{AB} \frac{\partial c_{AB}}{\partial r}) r \right] &= 0 \end{aligned} \quad (\text{Eq. S2})$$

Now using the definition of the constituent concentrations  $c_{Atot} = c_A + c_{AB}$  we can write for A

$$\frac{\partial c_{Atot}}{\partial t} + \frac{1}{r} \frac{\partial}{\partial r} \left[ \frac{(c_A s_A + c_{AB} s_{AB})}{c_{Atot} s_{Atot}} c_{Atot} s_{Atot} \omega^2 r^2 - \frac{(D_A \frac{\partial c_A}{\partial r} + D_{AB} \frac{\partial c_{AB}}{\partial r})}{D_{Atot} \frac{\partial c_{Atot}}{\partial r}} D_{Atot} \frac{\partial c_{Atot}}{\partial r} r \right] = 0 \quad (\text{Eq. S3})$$

and define the new quantities  $s_{Atot}$  and  $D_{Atot}$  such that

$$\frac{(c_A s_A + c_{AB} s_{AB})}{c_{Atot} s_{Atot}} = 1 \quad (\text{Eq. S4})$$

, i.e.

$$s_{Atot} = \frac{c_A s_A + c_{AB} s_{AB}}{c_{Atot}} = \frac{c_A s_A + K c_A c_B s_{AB}}{c_A + K c_A c_B}, \quad (\text{Eq. S5})$$

and

$$\frac{(D_A \frac{\partial c_A}{\partial r} + D_{AB} \frac{\partial c_{AB}}{\partial r})}{D_{Atot} \frac{\partial c_{Atot}}{\partial r}} = 1 \quad (\text{Eq. S6})$$

, or

$$D_{Atot} = \frac{D_A \frac{\partial c_A}{\partial r} + D_{AB} \frac{\partial c_{AB}}{\partial r}}{\frac{\partial c_{Atot}}{\partial r}} = \frac{D_A \frac{\partial c_A}{\partial r} + D_{AB} K \left[ c_A \frac{\partial c_B}{\partial r} + c_B \frac{\partial c_A}{\partial r} \right]}{\frac{\partial c_A}{\partial r} + K \left[ c_A \frac{\partial c_B}{\partial r} + c_B \frac{\partial c_A}{\partial r} \right]} . \quad (\text{Eq. S7})$$

With symmetric operations for B follow trivially from here Eq. 1, 2 and 3 in the paper.

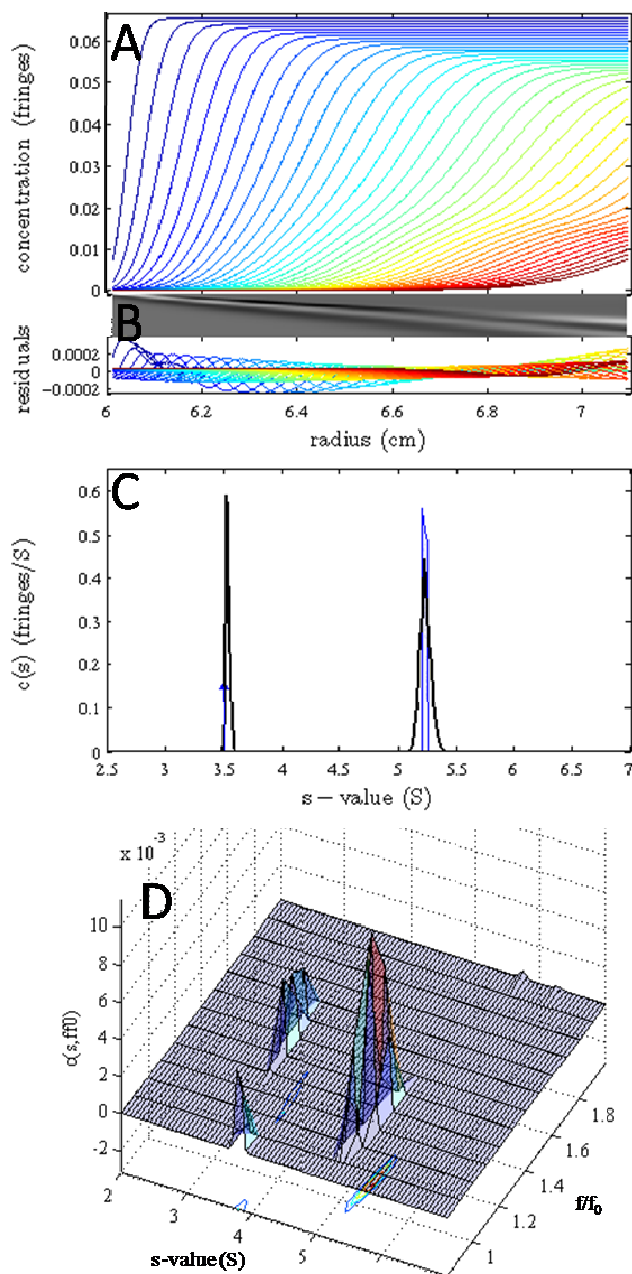

## Figure S1

Fitting concentration profiles of interacting systems with distributions of non-interacting species in the case of low polydispersity. Panel A: Lamm PDE solutions for the interacting systems of Figure 2 were calculated at equimolar loading concentrations  $c_{Btot} = c_{A_{tot}} = 0.2 K_D$  (solid lines). A fit of the concentration profiles with  $c(s)$  (dashed lines) gives an rmsd of 0.0096-fold the loading signal. Panel B: Residuals in overlay and bitmap format (28). Panel C: The resulting sedimentation coefficient distribution  $c(s)$  (black line), and the asymptotic boundary  $d\hat{c}/dv$  (blue patch, scaled) and the undisturbed boundary (blue stem, in units of fringes) as predicted from Gilbert-Jenkins theory.  $c(s)$  was calculated with maximum entropy regularization on a level of  $P = 0.95$ . A two discrete species model assigning a single  $s$ -value and  $D$ -value to the reaction boundary leads to an rmsd 0.0104-fold the loading signal (fit not shown). Panel D: Size-and-shape distribution  $c(s, f/f_0)$  fit to the same data, producing an rmsd of 0.0006-fold the loading signal.  $c(s, f/f_0)$  was calculated with Tikhonov regularization at a level of  $P = 0.95$ . The gridlines indicate the discretization of  $s$ -dimension and the  $f/f_0$ -dimension.

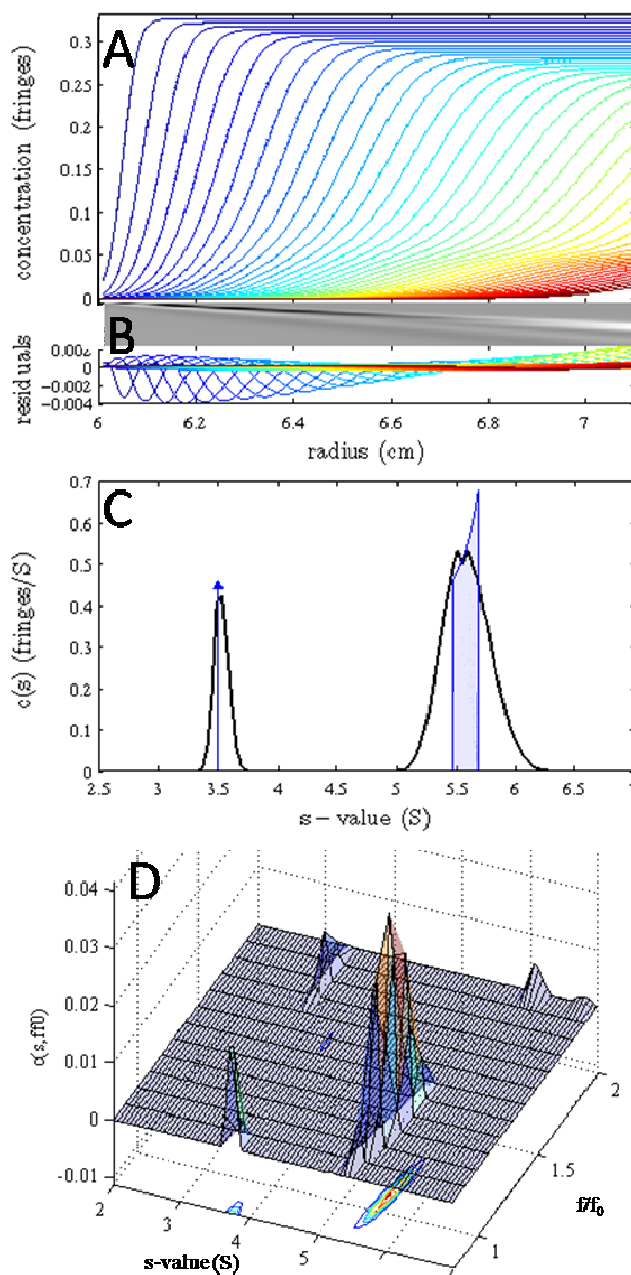

## Figure S2

Fitting concentration profiles of interacting systems with distributions of non-interacting species in the case of medium polydispersity. Panel A: Lamm PDE solutions for the interacting systems of Figure 2 were calculated at equimolar loading concentrations  $c_{Btot} = c_{A tot} = K_D$  (solid lines), and a fit of the concentration profiles with  $c(s)$  (dashed lines). Panel B: Residuals, with an rmsd of 0.0017-fold the loading signal. For comparison, a two discrete species model assigning a single  $s$ -value and  $D$ -value to the reaction boundary leads to an rmsd 0.0022-fold the loading signal (fit not shown). Panel C: The resulting sedimentation coefficient distribution  $c(s)$  (black line),  $d\hat{c}/dv$  (blue patch, scaled) and the amplitude of the undisturbed boundary (blue stem, in units of fringes). Panel D: Size-and-shape distribution  $c(s, f/f_0)$  fit to the same data, leading to an rmsd of 0.0011-fold the loading signal.

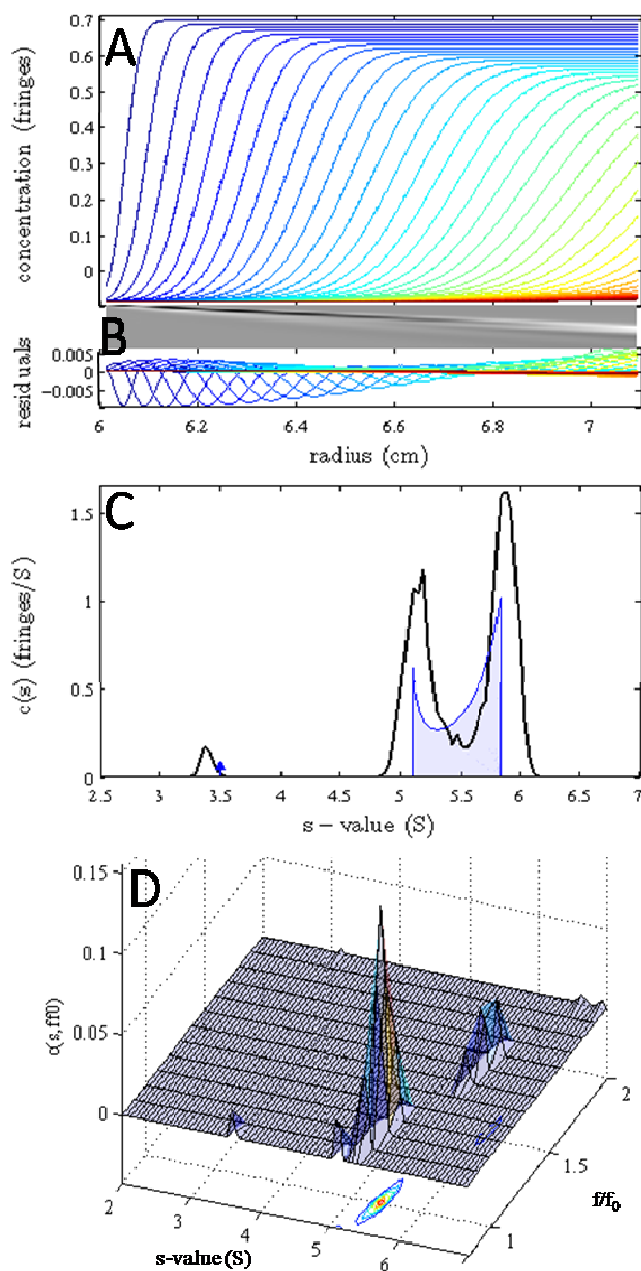

## Figure S3

Fitting concentration profiles of interacting systems with distributions of non-interacting species for the case of high polydispersity. Panel A: Lamm PDE simulations as in Figure 6, but for loading concentrations  $c_{Btot} = 3 K_D$  and  $c_{A tot} = 1.5 K_D$ , which is at the phase transition line by EPT in the region of stronger polydispersity of the reaction boundary (Figure 5). A fit of the concentration profiles with  $c(s)$  (dashed lines) gives an rmsd of 0.0019-fold the loading signal, with residuals as presented in Panel B. For comparison, a two discrete species model assigning a single  $s$ -value and  $D$ -value to the reaction boundary leads to an rmsd 0.0043-fold the loading signal (fit not shown). Panel C: The resulting sedimentation coefficient distribution  $c(s)$  (black line),  $d\hat{c}/dv$  (blue patch, scaled) and the amplitude of the undisturbed boundary (blue stem, in units of fringes). Panel D: The size-and-shape distribution  $c(s, f/f_0)$  fit to the same data produces an rmsd of 0.001-fold the loading signal. In  $c(s)$ , the second peak within the reaction boundary implies apparent  $M$ -values of 72 kDa, whereas in  $c(s, f/f_0)$  the secondary peak at  $\sim 6 S$  and  $f/f_0$  implies apparent  $M$ -values 1.5-fold the complex molar mass.
